# Supplementary material for: Hierarchical morphogenesis of swallowtail butterfly wing scale nanostructures
Source: eLife. 2023 Sep 28;12:RP89082. doi: 10.7554/eLife.89082 (PMC10538957; doi:10.7554/eLife.89082)
Supplement: Figure 4—figure supplement 5—source data 1. [file elife-89082-fig4-figsupp5-data1.xlsx]

## Sheet: Panel A (P. eurimedes)
Source data from FIJI/ImageJ (version 2.1.0/1.53c) measurements of SEM images of developing P. eurimedes scales used to generate the violin plot in panel A of Figure 4—figure supplement 5, along with P-values of the reported pairwise t-tests.
CK666 treatment details	honeycomb height (in nm)			Pairwise comparisons using t tests with pooled SD
52%(11day)_treatment	1878.78
52%(11day)_treatment	1861.72			HA: mcolumn < mrow	52%(11day)_treatment	52%(11day)_control	57%(12day)_treatment	57%(12day)_control
52%(11day)_treatment	2335.4			52%(11day)_control	0.02169	-	-	-
52%(11day)_treatment	2188.06			57%(12day)_treatment	0.0001	0.46775	-	-
52%(11day)_treatment	1996.12			57%(12day)_control	0.00036	0.46775	1	-
52%(11day)_treatment	2425.28			67%(14day)_control	0.0385	1	1	1
52%(11day)_treatment	2242.43
52%(11day)_treatment	2615.44
52%(11day)_treatment	2562.85
52%(11day)_treatment	2093.52
52%(11day)_treatment	1122.48
52%(11day)_treatment	2095.41
52%(11day)_treatment	1319.19
52%(11day)_treatment	1469.94
52%(11day)_treatment	1668.99
52%(11day)_treatment	1827.2
52%(11day)_treatment	893.71
52%(11day)_treatment	645.08
52%(11day)_treatment	2233.29
52%(11day)_treatment	2154.9
52%(11day)_treatment	1261.58
52%(11day)_treatment	777.05
52%(11day)_treatment	1622.66
52%(11day)_treatment	1101.04
52%(11day)_treatment	768.51
52%(11day)_treatment	1056.89
52%(11day)_treatment	1013.31
52%(11day)_treatment	1841.9
52%(11day)_treatment	884.19
52%(11day)_treatment	1715.27
52%(11day)_treatment	1738.29
52%(11day)_treatment	2196.68
52%(11day)_treatment	2185.95
52%(11day)_treatment	1500.18
52%(11day)_treatment	1686.04
52%(11day)_treatment	1386.35
52%(11day)_treatment	1506.38
52%(11day)_treatment	928.26
52%(11day)_treatment	1568.21
52%(11day)_treatment	1740.74
52%(11day)_control	1455.24
52%(11day)_control	1706.58
52%(11day)_control	1776.61
52%(11day)_control	1845.31
52%(11day)_control	1628.55
52%(11day)_control	1746.53
52%(11day)_control	1805.37
52%(11day)_control	1487.2
52%(11day)_control	2003.73
52%(11day)_control	1851.85
52%(11day)_control	1754.24
52%(11day)_control	1948.29
52%(11day)_control	1789.05
52%(11day)_control	1975.14
52%(11day)_control	1520.56
52%(11day)_control	1564.75
52%(11day)_control	1731.37
52%(11day)_control	1343.7
52%(11day)_control	2052.79
52%(11day)_control	2230.85
52%(11day)_control	2178.72
52%(11day)_control	2126.46
52%(11day)_control	1802.45
52%(11day)_control	1772.06
52%(11day)_control	2109.62
52%(11day)_control	1640.67
52%(11day)_control	2301.41
52%(11day)_control	1943.95
52%(11day)_control	2044.83
52%(11day)_control	1495.87
52%(11day)_control	1655.49
52%(11day)_control	1723.89
52%(11day)_control	1919.48
52%(11day)_control	1887
52%(11day)_control	2112.61
52%(11day)_control	2342.7
52%(11day)_control	1246.24
52%(11day)_control	2194.95
52%(11day)_control	2327.38
52%(11day)_control	2364.56
52%(11day)_control	1942.47
52%(11day)_control	1758.31
52%(11day)_control	1798.57
52%(11day)_control	1823.85
52%(11day)_control	1760.62
52%(11day)_control	2064.83
57%(12day)_treatment	1618.71
57%(12day)_treatment	2123.59
57%(12day)_treatment	1448.54
57%(12day)_treatment	1834.78
57%(12day)_treatment	2184.27
57%(12day)_treatment	1686.14
57%(12day)_treatment	2129.98
57%(12day)_treatment	2345.46
57%(12day)_treatment	1898.25
57%(12day)_treatment	2159
57%(12day)_treatment	1933.55
57%(12day)_treatment	1982.01
57%(12day)_treatment	2305.55
57%(12day)_treatment	2041.64
57%(12day)_treatment	1870.62
57%(12day)_treatment	1951.53
57%(12day)_treatment	2406
57%(12day)_treatment	1727.94
57%(12day)_treatment	1906.08
57%(12day)_treatment	1453.1
57%(12day)_treatment	2002.99
57%(12day)_treatment	1758.89
57%(12day)_treatment	1400.21
57%(12day)_treatment	1978.64
57%(12day)_treatment	1596.15
57%(12day)_treatment	2070.83
57%(12day)_treatment	2069.7
57%(12day)_treatment	2543.1
57%(12day)_treatment	1957.72
57%(12day)_treatment	2090.89
57%(12day)_treatment	1610.95
57%(12day)_treatment	1604.07
57%(12day)_treatment	1961.58
57%(12day)_treatment	2057.97
57%(12day)_treatment	2102.41
57%(12day)_treatment	1266.06
57%(12day)_treatment	1935.43
57%(12day)_treatment	2365.66
57%(12day)_treatment	1628.23
57%(12day)_treatment	2336.29
57%(12day)_treatment	1566.73
57%(12day)_treatment	2327.19
57%(12day)_treatment	2006.56
57%(12day)_treatment	2105.55
57%(12day)_treatment	2581.54
57%(12day)_treatment	1824.56
57%(12day)_treatment	1968.55
57%(12day)_treatment	2125.18
57%(12day)_treatment	2346.09
57%(12day)_treatment	2119.12
57%(12day)_treatment	2048.35
57%(12day)_treatment	2104.18
57%(12day)_treatment	2336.4
57%(12day)_treatment	2398.8
57%(12day)_treatment	2509.4
57%(12day)_treatment	1900.7
57%(12day)_treatment	2392.01
57%(12day)_treatment	1986.17
57%(12day)_treatment	1626.63
57%(12day)_treatment	1181.06
57%(12day)_treatment	1499.92
57%(12day)_treatment	1589.92
57%(12day)_treatment	1644.54
57%(12day)_treatment	1481.03
57%(12day)_treatment	1804.77
57%(12day)_treatment	1845.46
57%(12day)_treatment	1899.48
57%(12day)_treatment	1918.38
57%(12day)_treatment	1855.99
57%(12day)_treatment	1968.55
57%(12day)_control	2033.35
57%(12day)_control	2031.48
57%(12day)_control	2002.05
57%(12day)_control	2420.33
57%(12day)_control	2471.32
57%(12day)_control	2624.95
57%(12day)_control	2073.01
57%(12day)_control	2532.13
57%(12day)_control	1855.64
57%(12day)_control	2258.43
57%(12day)_control	1910.07
57%(12day)_control	1895.67
57%(12day)_control	1672.39
57%(12day)_control	1796.52
57%(12day)_control	2161.83
57%(12day)_control	1553.14
57%(12day)_control	2192.72
57%(12day)_control	2137.49
57%(12day)_control	1804.41
57%(12day)_control	1845.49
57%(12day)_control	1824.13
57%(12day)_control	2158.98
57%(12day)_control	1852.84
57%(12day)_control	1268.14
57%(12day)_control	1270.23
57%(12day)_control	1856.05
57%(12day)_control	2001.36
57%(12day)_control	1993.5
57%(12day)_control	1951.69
57%(12day)_control	1642.78
57%(12day)_control	1916.76
57%(12day)_control	2122.97
57%(12day)_control	1808.74
57%(12day)_control	1953.46
57%(12day)_control	2043.58
57%(12day)_control	1912.27
67%(14day)_control	1538.46
67%(14day)_control	1643.18
67%(14day)_control	1410.6
67%(14day)_control	1448.98
67%(14day)_control	2035.21
67%(14day)_control	1631.47
67%(14day)_control	2205.03
67%(14day)_control	1868.73
67%(14day)_control	2053.64
67%(14day)_control	1411.53
67%(14day)_control	1972.83
67%(14day)_control	1891.73
67%(14day)_control	2329.15
67%(14day)_control	1827.35
67%(14day)_control	2299.25
67%(14day)_control	1974.19
67%(14day)_control	1639.38
67%(14day)_control	1945.79
67%(14day)_control	1809.89
67%(14day)_control	1813.42
67%(14day)_control	1827.27
67%(14day)_control	1897.63
67%(14day)_control	1729.57
67%(14day)_control	2035.71
67%(14day)_control	1765.9
67%(14day)_control	2144.01
67%(14day)_control	1686.71
67%(14day)_control	1908.74
67%(14day)_control	1701.79
67%(14day)_control	1895.26
67%(14day)_control	2086.91
67%(14day)_control	1722.29
67%(14day)_control	1656.48
67%(14day)_control	2138.7
67%(14day)_control	1728.21
67%(14day)_control	1854.35
67%(14day)_control	2006.89

## Sheet: Panel D (P. iphidamas)
Source data from FIJI/ImageJ (version 2.1.0/1.53c) measurements of SEM images of developing P. iphidamas scales used to generate the violin plot in panel D of Figure 4—figure supplement 5, along with P-values of the reported pairwise t-tests.
CK666 treatment details	honeycomb height (in nm)			Pairwise comparisons using t tests with pooled SD
52%(11day)_treatment	1442.43			HA: mcolumn < mrow	52%(11day)_treatment
52%(11day)_treatment	1396.04			52%(11day)_control	4.4e-07
52%(11day)_treatment	1645.07
52%(11day)_treatment	1614.38
52%(11day)_treatment	1573.88
52%(11day)_treatment	1350.5
52%(11day)_treatment	1385.28
52%(11day)_treatment	1445.49
52%(11day)_treatment	1400.87
52%(11day)_treatment	1301.54
52%(11day)_treatment	1207.7
52%(11day)_treatment	1393.04
52%(11day)_treatment	1516.9
52%(11day)_treatment	1057.07
52%(11day)_treatment	1541.42
52%(11day)_treatment	1479.14
52%(11day)_treatment	1111.07
52%(11day)_treatment	1521
52%(11day)_control	2296
52%(11day)_control	2415.64
52%(11day)_control	1869.88
52%(11day)_control	2100.82
52%(11day)_control	2280.48
52%(11day)_control	1665.78
52%(11day)_control	1703.77
52%(11day)_control	1977.23
52%(11day)_control	2614.31
52%(11day)_control	1235.08
52%(11day)_control	1566.44
52%(11day)_control	1520.22
52%(11day)_control	1496.36
52%(11day)_control	1600.21
52%(11day)_control	1869.5
52%(11day)_control	1901.78
52%(11day)_control	2128.16
52%(11day)_control	2408.09
52%(11day)_control	1838.82
52%(11day)_control	2032.08
52%(11day)_control	2205.95
52%(11day)_control	1596.9
52%(11day)_control	2105.89
